# Supplementary material for: Community access to palliative care medicines – patient and professional experience: systematic review and narrative synthesis
Source: HighWire-hosted journal article supplement (doi:10.1136/bmjspcare-2020-002761), 2021-03-28
Supplement: bmjspcare-2020-002761supp001_data_supplement.pdf [file bmjspcare-2020-002761supp001_data_supplement.pdf]

**Online supplemental material Table 1. Search terms for MEDLINE(EBSCO)**


---

|     |                                                                                  |
|-----|----------------------------------------------------------------------------------|
| S1  | (MH "Palliative Care")                                                           |
| S2  | (MH "Terminal Care")                                                             |
| S3  | palliative n3 care                                                               |
| S4  | terminal N3 care                                                                 |
| S5  | "end of life" or EOL                                                             |
| S6  | palliat*                                                                         |
| S7  | terminal and patients                                                            |
| S8  | medicat*                                                                         |
| S9  | medicine*                                                                        |
| S10 | drug*                                                                            |
| S11 | (MH "Pharmacies")                                                                |
| S12 | (MH "Community Pharmacy Services")                                               |
| S13 | access*                                                                          |
| S14 | suppl*                                                                           |
| S15 | dispens*                                                                         |
| S16 | distribut*                                                                       |
| S17 | availab*                                                                         |
| S18 | deliver*                                                                         |
| S19 | administ*                                                                        |
| S20 | "out of hours"                                                                   |
| S21 | prescri*                                                                         |
| S22 | pharmac*                                                                         |
| S23 | primary N3 care                                                                  |
| S24 | primary health care                                                              |
| S25 | home                                                                             |
| S26 | communit*                                                                        |
| S27 | general practice                                                                 |
| S28 | (MH "General Practice")                                                          |
| S29 | "Family practice"                                                                |
| S30 | local N3 Pharmac*                                                                |
| S31 | "Community practice"                                                             |
| S32 | Community N3 Pharmac*                                                            |
| S33 | S1 OR S2 OR S3 OR S4 OR S5 OR S6 OR S7                                           |
| S34 | S8 OR S9 OR S10                                                                  |
| S35 | S11 OR S12 OR S13 OR S14 OR S15 OR S16 OR S17 OR S18 OR S19 OR S20 OR S21 OR S22 |
| S36 | S23 OR S24 OR S25 OR S26 OR S27 OR S28 OR S29 OR S30 OR S31 OR S32               |
| S37 | S33 AND S34 AND S35 AND S36                                                      |

Limiters - Date of Publication: 20060101-20180331; English Language; Human; Age Related: All Adult: 19+ years

---

MH: medical subject headings, N3: allowing 0 to 3 words between the words
