# Supplementary material for: Community access to palliative care medicines – patient and professional experience: systematic review and narrative synthesis
Source: HighWire-hosted journal article supplement (doi:10.1136/bmjspcare-2020-002761), 2021-03-28
Supplement: bmjspcare-2020-002761supp003_data_supplement.pdf [file bmjspcare-2020-002761supp003_data_supplement.pdf]

**Online supplemental material Table 3. Quality assessments of included studies.**

| <b>Qualitative studies</b>  | <b>1.1. Is the qualitative approach appropriate to answer the research question?</b> | <b>1.2. Are the qualitative data collection methods adequate to address the research question?</b>    | <b>1.3. Are the findings adequately derived from the data?</b>                     | <b>1.4. Is the interpretation of results sufficiently substantiated by data?</b> | <b>1.5. Is there coherence between qualitative data sources, collection, analysis and interpretation?</b> |
|-----------------------------|--------------------------------------------------------------------------------------|-------------------------------------------------------------------------------------------------------|------------------------------------------------------------------------------------|----------------------------------------------------------------------------------|-----------------------------------------------------------------------------------------------------------|
| Akram et al. 2012           | Yes                                                                                  | Yes<br>35 pharmacists in 5 focus groups<br>Verbatim transcription                                     | Yes<br>Framework Analysis<br>Independent coding and validation process             | Yes<br>Quotation is adequately employed for each theme.                          | Yes                                                                                                       |
| Bennie et al. 2013          | Yes                                                                                  | Can't Tell<br>No description of the topic guide.                                                      | Can't Tell<br>No description of the method of qualitative analysis                 | Yes<br>Quotation is adequately employed for each theme.                          | Yes                                                                                                       |
| Kuruville et al. 2018       | Yes                                                                                  | Yes                                                                                                   | Yes<br>Framework Analysis<br>Independent coding and discussion of discrepancies    | Yes                                                                              | Yes                                                                                                       |
| Latham and Nyatanga 2018    | Yes                                                                                  | Can't Tell<br>Full details of purposive sampling not given.<br>Interview schedule validation unclear. | Yes<br>Constant comparative method is reasonable for interpretative phenomenology. | Yes<br>Quotation is adequately employed for each theme.                          | Yes                                                                                                       |
| <b>Quantitative studies</b> | <b>4.1. Is the sampling strategy relevant to address the research question?</b>      | <b>4.2. Is the sample representative of the target population?</b>                                    | <b>4.3. Are the measurements appropriate?</b>                                      | <b>4.4. Is the risk of nonresponse bias low?</b>                                 | <b>4.5. Is the statistical analysis appropriate to answer the research question?</b>                      |

|                            |                                                                                                                                                                                                                     |                                                                                                                                                                       |                                                                                                                                                                                                                                                          |                                                                                                                                                      |                               |
|----------------------------|---------------------------------------------------------------------------------------------------------------------------------------------------------------------------------------------------------------------|-----------------------------------------------------------------------------------------------------------------------------------------------------------------------|----------------------------------------------------------------------------------------------------------------------------------------------------------------------------------------------------------------------------------------------------------|------------------------------------------------------------------------------------------------------------------------------------------------------|-------------------------------|
| Lucey et al 2008           | Yes<br>All GPs, pharmacists in one city area; all patients over a 3 month period in the hospice; unclear details of if / how nurses were sampled.                                                                   | Can't Tell<br>Details of respondents are not given, other than as part of the target sample                                                                           | Can't Tell<br>Details of the development of the questionnaires are not given                                                                                                                                                                             | No<br>Response rates were: GPs 41%; pharmacists 33% and patients 38.5%.                                                                              | Yes                           |
| Bishop et al. 2009         | Yes<br>Sampling process is adequate; surveyed all active programs in the target area                                                                                                                                | Can't Tell<br>Clear description of the sample and reasonable as a local study but difficult to understand if generalisable across country or globally.                | Yes<br>The survey question was reviewed by a third party and seems to be reasonable.<br>Data collection method of telephone interview was not described.                                                                                                 | Yes<br>All candidates were contacted and response rate of the survey was 22/22.<br>Results from 1 program were not included due to limited response. | Yes<br>Descriptive statistics |
| Walker and McPherson. 2010 | Can't Tell<br>1) Sampling process for the survey is adequate; surveyed all active programs in the target area.<br>2) No details of the method of sampling hospices or nurses within them for the comparative study. | Can't Tell<br>1) Details of survey respondent sample and hospices are lacking.<br>2) No details of hospices or nurses taking part in the comparative study are given. | Yes<br>1) Survey questions seem to be reasonable though it was only internally reviewed. Data collection method of telephone interview was not described.<br>2) Methods for comparing frequency, estimated cost and client satisfaction were reasonable. | Yes<br>1) 21/23 programs in the area participated and 14 reported using EMK<br>2) No details are given on response rates of nurses in the hospices   | Yes<br>Descriptive statistics |
| Ise et al. 2010            | Yes<br>Random sampling from a community pharmacist database                                                                                                                                                         | Yes<br>Clear description of the sample with adequate methods.                                                                                                         | Yes<br>The survey question was clearly defined and seemed to be reasonable though it was only internally reviewed.                                                                                                                                       | No<br>Response rate was low at 34.5%.                                                                                                                | Yes                           |

|                   |                                                                            |                                                                                                                                                     |                                                                        |                                                                                                                             |     |
|-------------------|----------------------------------------------------------------------------|-----------------------------------------------------------------------------------------------------------------------------------------------------|------------------------------------------------------------------------|-----------------------------------------------------------------------------------------------------------------------------|-----|
| Leigh et al. 2013 | Can't Tell<br>No details of sampling method of hospice agencies for nurses | No<br>Only 77% had cared for a veteran with the institution's HEMK<br>Reasons why eligible individuals chose not to participate were not described. | Can't Tell<br>No details of the development of the nurse questionnaire | No<br>Response rate of the questionnaire was 49% (78/160); authors acknowledge there may have been a positive response bias | Yes |
|-------------------|----------------------------------------------------------------------------|-----------------------------------------------------------------------------------------------------------------------------------------------------|------------------------------------------------------------------------|-----------------------------------------------------------------------------------------------------------------------------|-----|

| <b>Mixed-method study</b> | <b>5.1. Is there an adequate rationale for using a mixed method design to address the research question?</b> | <b>5.2. Are the different components of the study effectively integrated to answer the research question?</b> | <b>5.3. Are the outputs of the integration of qualitative and quantitative components adequately interpreted?</b> | <b>5.4. Are divergences and inconsistencies between quantitative and qualitative results adequately addressed?</b> | <b>5.5. Do the different components of the study adhere to the quality criteria of each tradition of the methods involved?</b>                                                      |
|---------------------------|--------------------------------------------------------------------------------------------------------------|---------------------------------------------------------------------------------------------------------------|-------------------------------------------------------------------------------------------------------------------|--------------------------------------------------------------------------------------------------------------------|-------------------------------------------------------------------------------------------------------------------------------------------------------------------------------------|
| Miller 2017               | Yes                                                                                                          | Yes                                                                                                           | Yes                                                                                                               | Can't tell<br>Divergences and inconsistencies were not described in much detail.                                   | Yes<br>1) QUAN (Observational study): The sampling strategy was reasonable but limited participants.<br>2) QUAL (interviews): There was a clear description and reasonable methods. |
